# Supplementary material for: Robust fluorine-rich YF3 artificial interfacial layer for providing uniform Zn2+ flux and enhancing cycling stability of Zn anodes
Source: Royal Society of Chemistry journal article supplement (doi:10.1039/d5nr02426a), 2025-01-01
Supplement: d5nr02426a1.pdf [file d5nr02426a1.pdf]

## ***Electronic Supplementary Information***

### **Robust Fluorine-Rich YF<sub>3</sub> Artificial Interfacial Layer for Providing Uniform Zn<sup>2+</sup> Flux and Enhancing Cycling Stability of Zn Anodes**

Run Jiao<sup>a</sup>, Yanjie Wang<sup>a\*</sup>, Jiahui Liu<sup>a</sup>, Shuai Guo<sup>a</sup>, Diandian Han<sup>a</sup>, Wanwan Li<sup>b</sup>, Han Zhao<sup>a</sup>, Juan Shi<sup>a</sup>, Kongyao Chen<sup>a\*</sup> and Liwei Mi<sup>c\*</sup>

<sup>a</sup> Henan Key Laboratory of Functional Salt Materials, School of Material Electronics and Energy Storage, Zhongyuan University of Technology, Zhengzhou 45007, P. R. China

<sup>b</sup> College of Intelligent Textile and Fabric Electronics, Zhongyuan University of Technology, Zhengzhou 45007, P. R. China

<sup>c</sup> Yaoshan laboratory, Pingdingshan University, Pingdingshan 467000, P. R. China

\*Corresponding author(s): wangyj6527@zut.edu.cn, chenkongyao@zut.edu.cn, mlwzzu@163.com

## Experimental Section

**Material characterization.** The microstructure and elemental distribution of the samples were analyzed by scanning electron microscopy (SEM, Merlin compact, Zeiss, Germany) and energy dispersive spectrometer (EDS). The phase and structure of the samples were characterized by X-ray diffraction (XRD, Rigaku Ultima IV) in the Cu K $\alpha$  wavelength range of 10° to 90° with a scanning rate of 10° min<sup>-1</sup>. The surface chemical composition of the electrode was characterized by X-ray photoelectron spectroscopy (XPS, Thermo Scientific K-Alpha). The contact angle between the Zn sheet and YF<sub>3</sub>@Zn was measured by a contact angle meter (OCA200, Beijing Data Instrument Co., Ltd.), with the contact angle ranging from 0° to 180°. The specific surface area and pore distribution were calculated by Barrett-Joyner-Halenda (BJH) method.

**Assembly processes of electrochemical devices.** The assembly process of the Zn//Zn symmetric cell: First, the commercial Zn foil with a thickness of 200  $\mu$ m is ultrasonically cleaned with ethanol and deionized water, followed by drying in a nitrogen atmosphere to obtain the treated Zn electrode. Two pieces of treated Zn electrode with a diameter of 8 mm are selected as electrodes, with Whatman GF/C glass fiber paper serving as the separator and a 2 M ZnSO<sub>4</sub> aqueous solution as the electrolyte to assemble a CR2032-type Zn//Zn symmetric coin cell.

The assembly process of the Zn//Cu half-cell: A Cu sheet with a diameter of 8 mm is employed as the working electrode, while a Zn electrode with a diameter of 8 mm is selected as a counter electrode. Whatman GF/C glass fiber paper is used as the separator, and a 2 M ZnSO<sub>4</sub> aqueous solution serves as the electrolyte to assemble a CR2032-type Zn//Cu half-cell coin cell.

The preparation process of the activated carbon (AC) electrode: The electrode slurry is prepared by mixing AC powder with polytetrafluoroethylene (PTFE) in a mass ratio of 8:2. This slurry is then coated onto a titanium (Ti) foil current collector. After drying at 60 °C overnight, the dried Ti foil coated with AC is cut into AC electrode sheets with a diameter of 8 mm.

The assembly process for Zn//AC zinc-ion capacitors: The AC electrode is utilized as the cathode, while the treated Zn electrode is selected as an anode. Whatman GF/C glass fiber paper is used as the separator, and a 2 M ZnSO<sub>4</sub> aqueous solution serves as the electrolyte to assemble a CR2032-type Zn//AC coin zinc ion capacitor.

**Electrochemical Measurements.** Zn//Zn symmetrical cells, Zn//Ti half cells and Zn//AC zinc-ion capacitors were assembled using CR2023 coin batteries and tested on a LAND battery testing system (CT2001A model battery tester from Wuhan Lantian Electronics Co., Ltd.). At room temperature, 2 M ZnSO<sub>4</sub> solution was used as the electrolyte. The cycling stability of the zinc anode was tested at current densities of 5 mA cm<sup>-2</sup> and 2 mA cm<sup>-2</sup> using Zn//Zn (YF<sub>3</sub>@Zn//YF<sub>3</sub>@Zn) cells. AC impedance spectroscopy (EIS), cyclic voltammetry (CV), and chronopotentiometry (C) tests were conducted on a CHI600E electrochemical workstation. Zinc sheets and platinum electrodes were used as the working and counter electrodes, respectively, with an Ag/AgCl electrode as the reference electrode for linear polarization curve and linear sweep voltammetry (LSV) measurements. LSV tests were carried out at a scan rate of 2 mV s<sup>-1</sup> and a scan range of -1.4 to -2.0 V to evaluate the hydrogen evolution reaction of different electrode sheets. Linear polarization curves were measured at a scan rate of 1 mV s<sup>-1</sup> between -0.2 and -1.2 V (versus Ag/AgCl electrode). Zn//AC zinc-ion capacitors were assembled using AC as the positive electrode and pure zinc or SYF<sub>3</sub>-Zn as the negative electrode with ZnSO<sub>4</sub> electrolyte. The positive electrode slurry was prepared by mixing activated carbon powder and polyvinylidene

fluoride (PVDF) at a mass ratio of 8:2 in N-methyl-2-pyrrolidone (NMP) solution. The slurry was then coated onto titanium foil and dried in a vacuum oven at 70°C for 12 hours to obtain an AC cathode ( $\Phi = 8$  mm) with a surface loading of approximately 1-2 mg cm<sup>-2</sup>. All zinc foils used in the experiments had a thickness of 0.1 mm and a diameter of 8 mm.

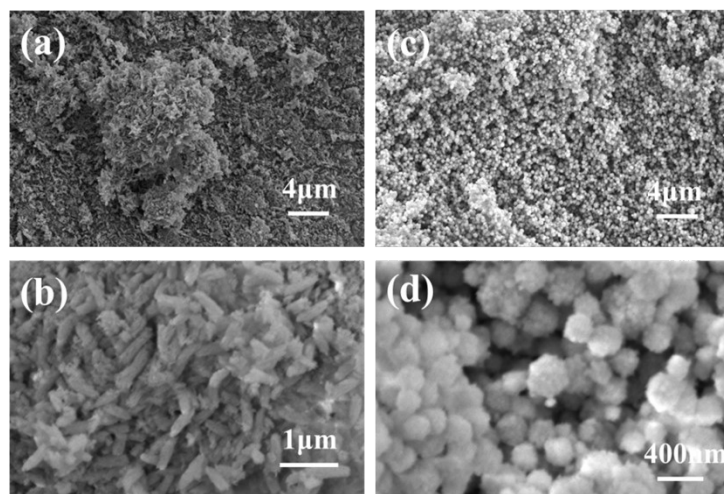

**Fig. S1.** (a-b) SEM images of CYF<sub>3</sub> at different magnifications and (c-d) SEM images of SYF<sub>3</sub> at different magnifications

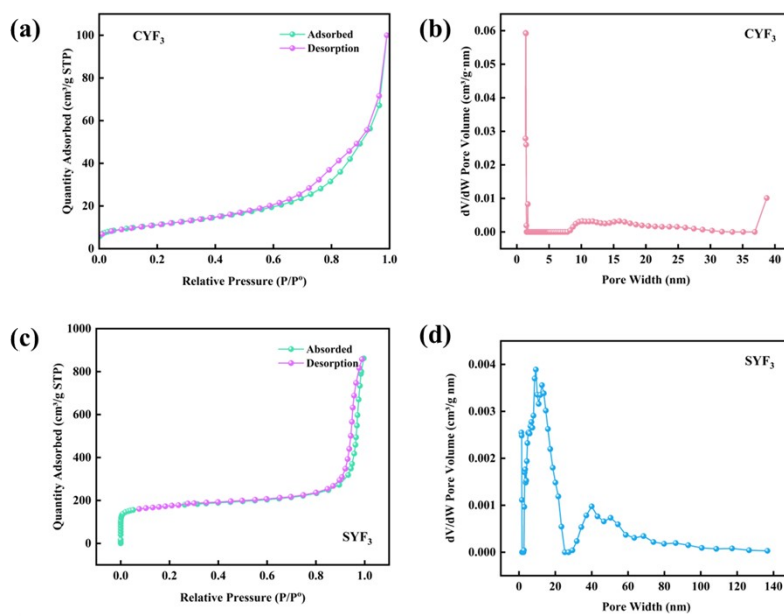

**Fig. S2.** The adsorption-desorption isotherm of CYF<sub>3</sub> (a) and SYF<sub>3</sub>(c), pore distribution curves of CYF<sub>3</sub>(b) and SYF<sub>3</sub>(d)

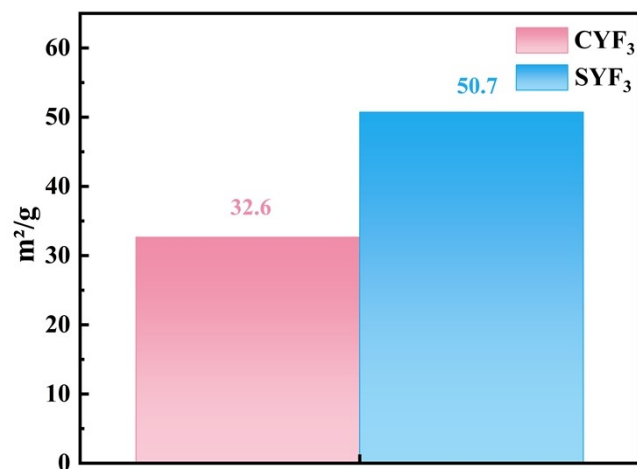

Fig. S3. Comparison chart of corresponding specific surface areas of CYF<sub>3</sub> and SYF<sub>3</sub>

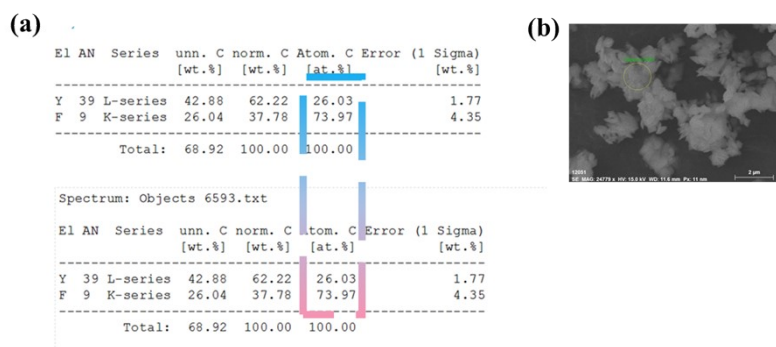

Fig. S4. The molar ration of Y:F (a) in CYF<sub>3</sub> measured by energy dispersive spectrometer within the selected area (b)

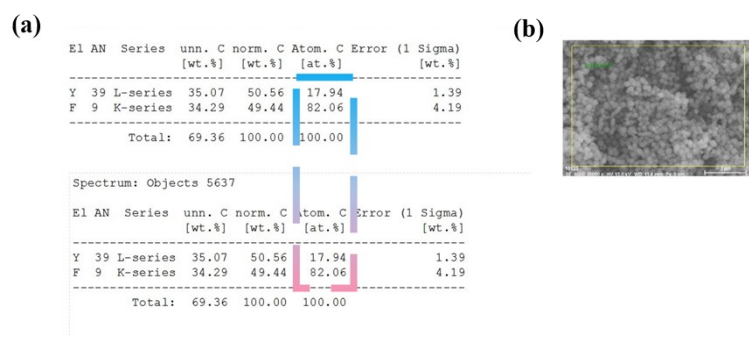

Fig. S5. (a) The molar ration of Y:F in SYF<sub>3</sub> measured by energy dispersive spectrometer within the selected area (b).

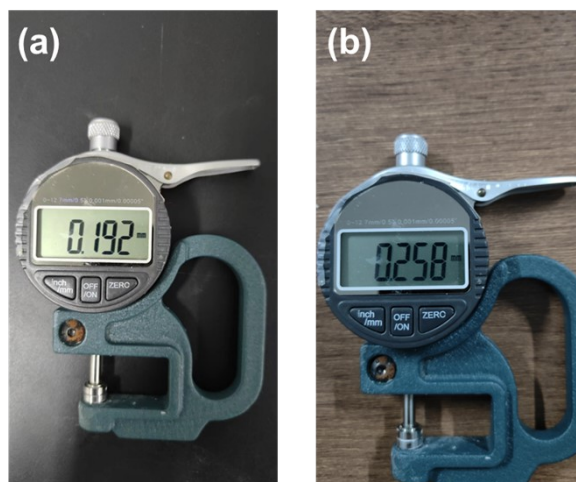

**Fig. S6.** Thickness of Zn electrode sheet before (a) and after (b) coated with  $\text{SYF}_3$

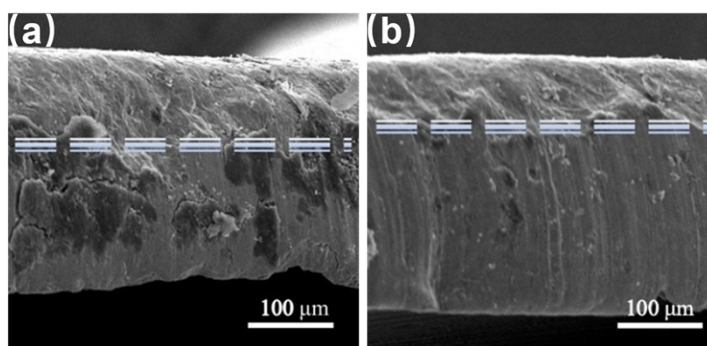

**Fig. S7.** SEM images of the cross-section of  $\text{CYF}_3@\text{Zn}$  (a) and  $\text{SYF}_3@\text{Zn}$  (b)

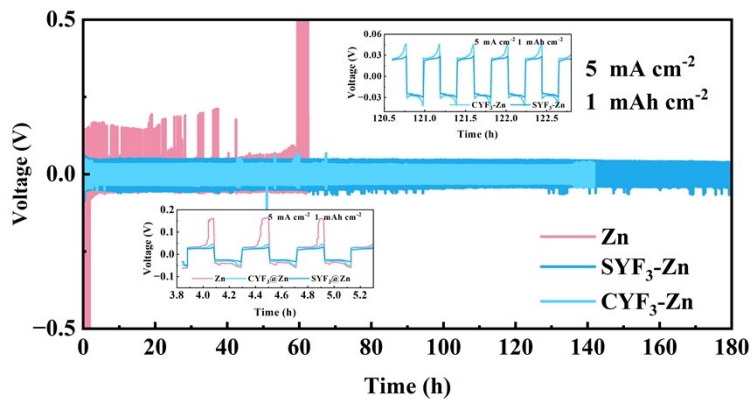

**Fig. S8.** The cycle performance of Zn//Zn, CYF<sub>3</sub>@Zn//CYF<sub>3</sub>@Zn and SYF<sub>3</sub>@Zn//SYF<sub>3</sub>@Zn symmetric batteries under a high-temperature condition (55 °C)

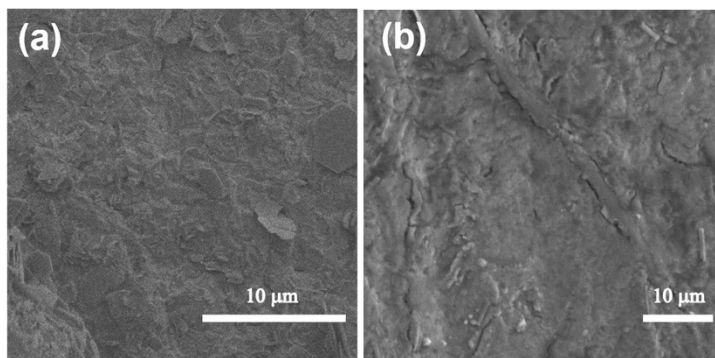

**Fig. S9.** SEM image of Zn deposits on Cu side in Zn-Cu half-cell after 200 cycles before and after introducing SYF<sub>3</sub> interlayer: (a) pure Zn, (b) SYF<sub>3</sub>@Zn

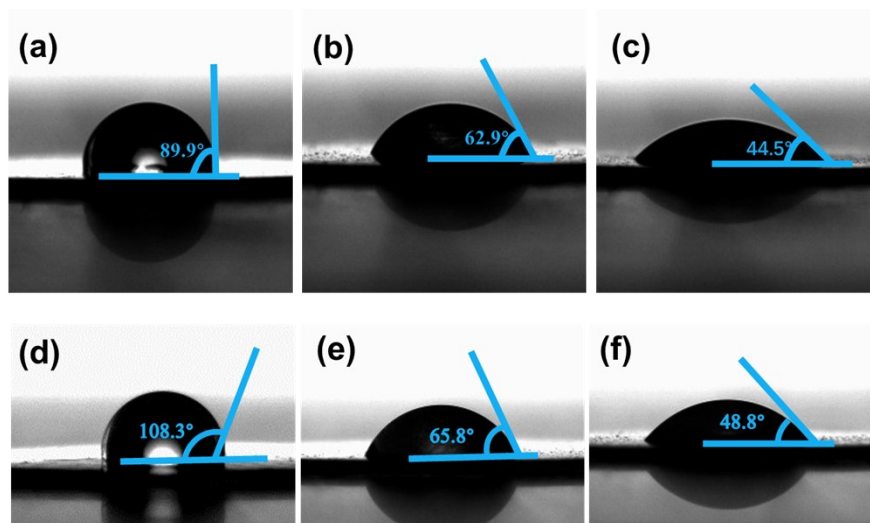

**Fig. S10.** Contact angles of 2M ZnSO<sub>4</sub> electrolyte on (a) pure Zn electrode sheet, (b) CYF<sub>3</sub>@Zn electrode sheet, and (c) SYF<sub>3</sub>@Zn electrode sheet.

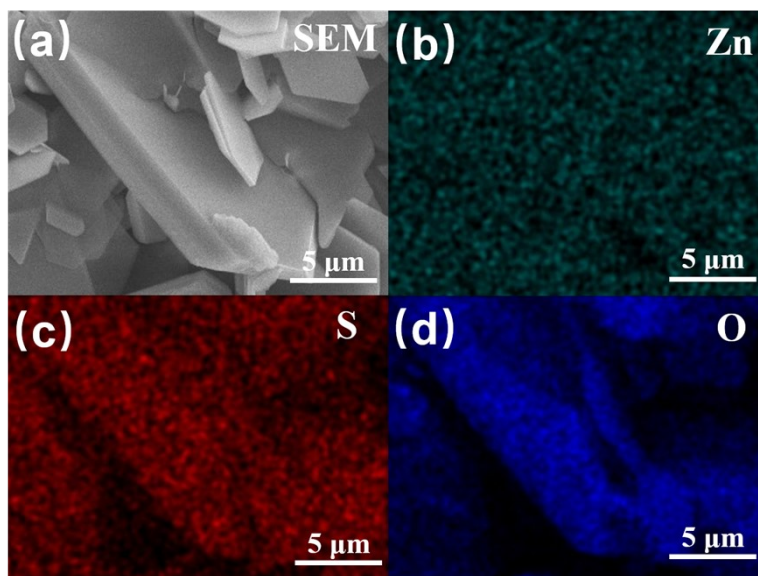

**Fig. S11.** SEM images (a) and EDS element mappings (b-d) of Zn, S and O of pure Zn sheet after immersion in 2M ZnSO<sub>4</sub> electrolyte for 7 days



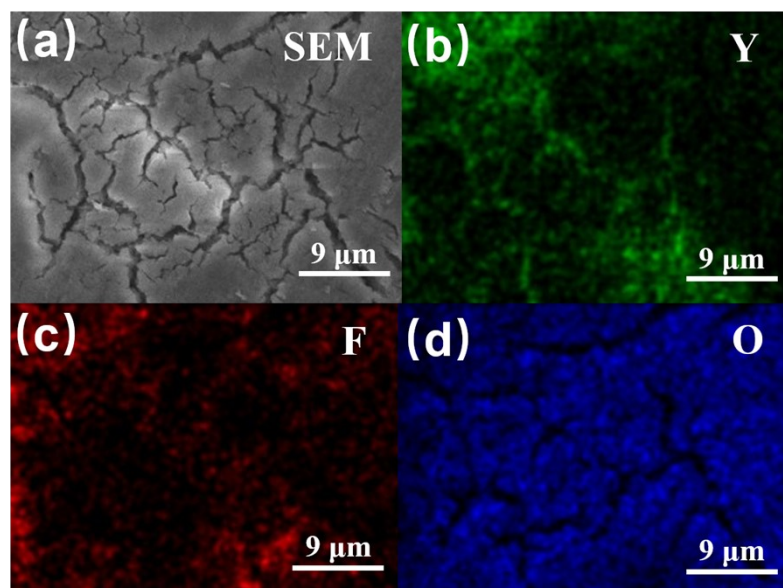

**Fig. S12.** SEM images (a) and EDS elemental mappings (b-d) of Y, F and O of CYF<sub>3</sub>@Zn sheet after immersion in a 2 M ZnSO<sub>4</sub> electrolyte for 7 days

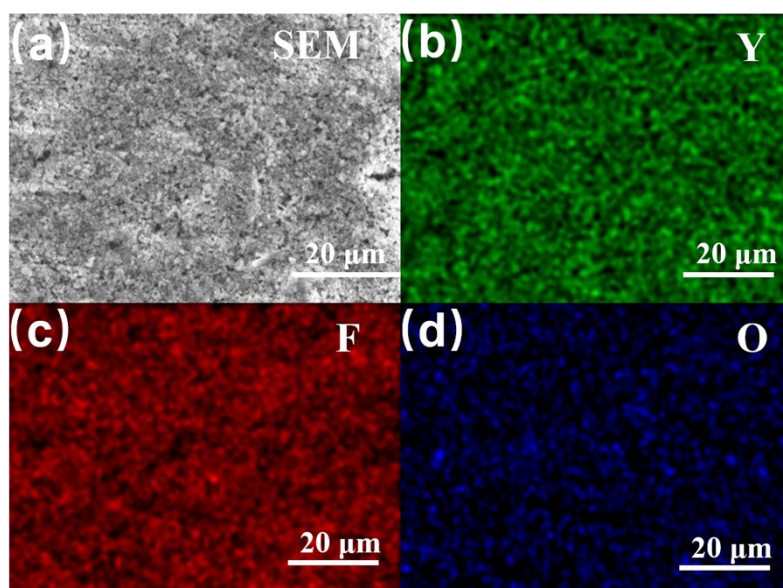

**Fig. S13.** SEM images (a) and EDS elemental mappings (b-d) of Y, F and O of SYF<sub>3</sub>@Zn sheet after immersion in a 2 M ZnSO<sub>4</sub> electrolyte for 7 days



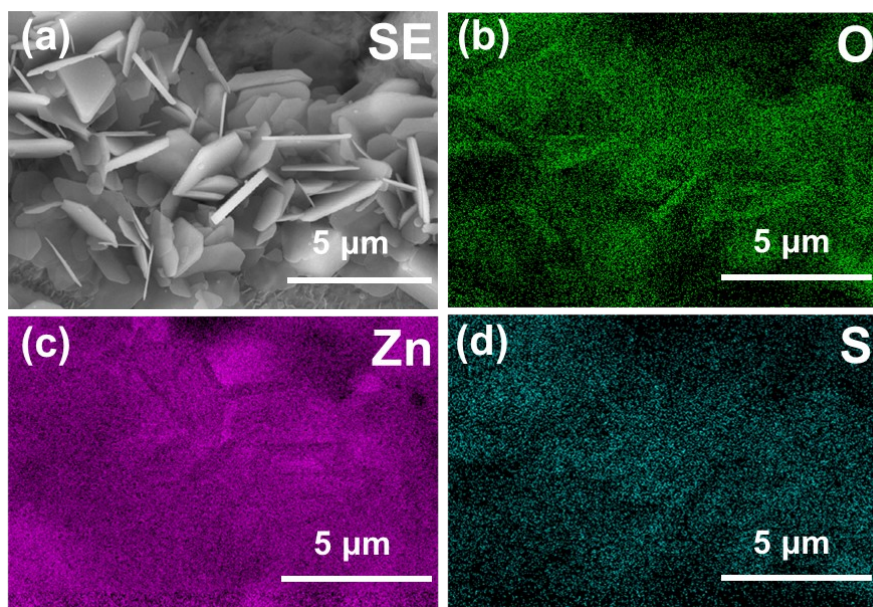

**Fig. S14.** SEM images (a) and EDS elemental mappings (b-d) of O, Zn and S of pure Zn sheet after 200 cycles at  $5 \text{ mA cm}^{-2}$ ,  $1 \text{ mAh cm}^{-2}$ .

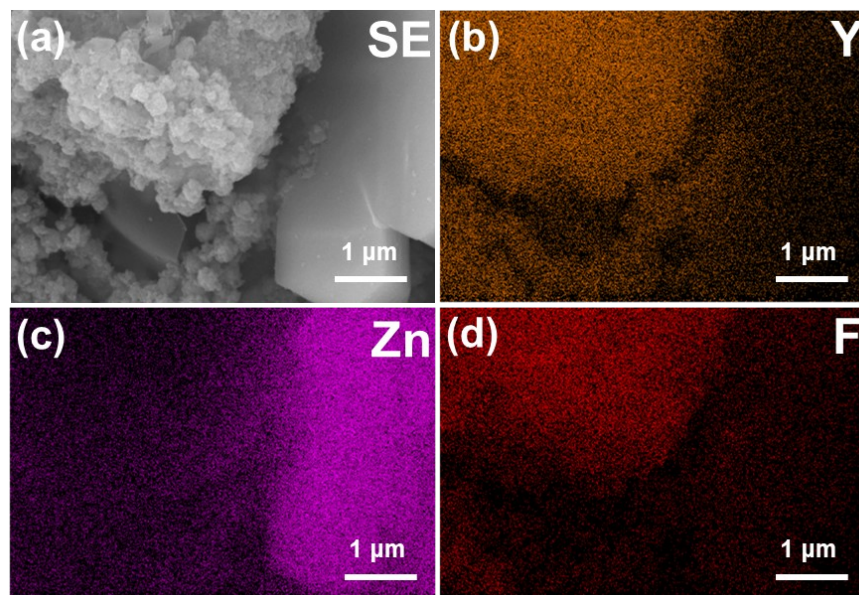

**Fig. S15.** SEM images (a) and EDS elemental mappings (b-d) of F, Zn and Y of CYF<sub>3</sub>@Zn sheet after 200 cycles at  $5 \text{ mA cm}^{-2}$ ,  $1 \text{ mAh cm}^{-2}$ .

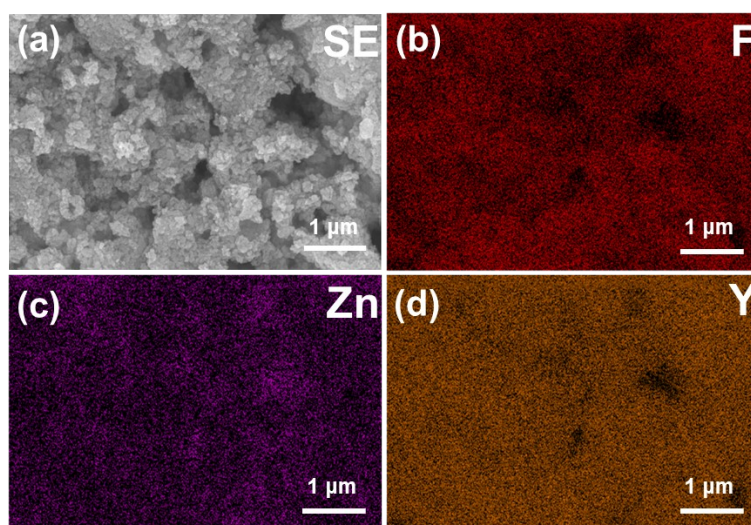

**Fig. S16.** SEM images (a) and EDS elemental mappings (b-d) of F, Zn and Y of SYF<sub>3</sub>@Zn sheet after 200 cycles at 5 mA cm<sup>-2</sup>, 1 mAh cm<sup>-2</sup>.

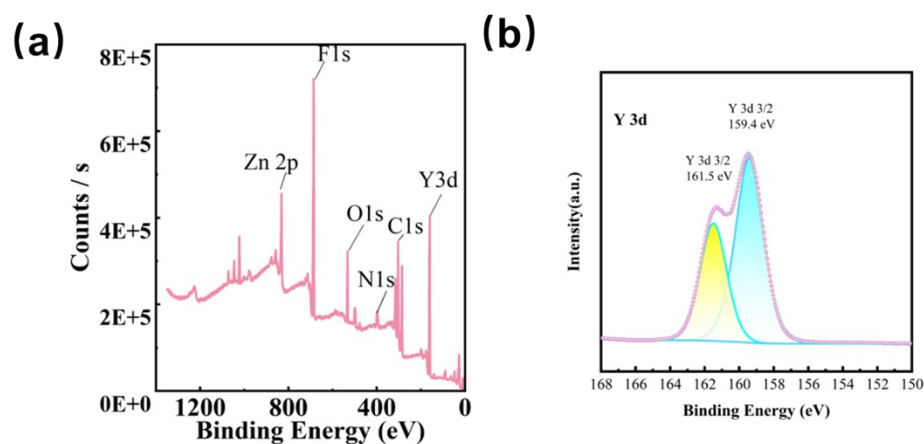

**Fig. S17.** XPS full spectrum (a) and high-resolution spectrum of Y element (b) of SYF<sub>3</sub>@Zn electrode after 200 cycles in Zn-based symmetrical battery

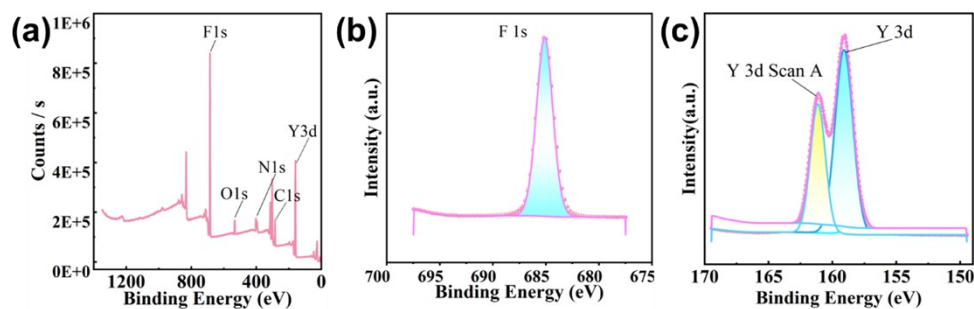

**Fig. S18.** XPS full spectrum (a), high-resolution spectrum of F element (b) and high-resolution spectrum of Y element (c) of  $\text{CYF}_3@\text{Zn}$  electrode after 200 cycles in Zn-based symmetrical battery

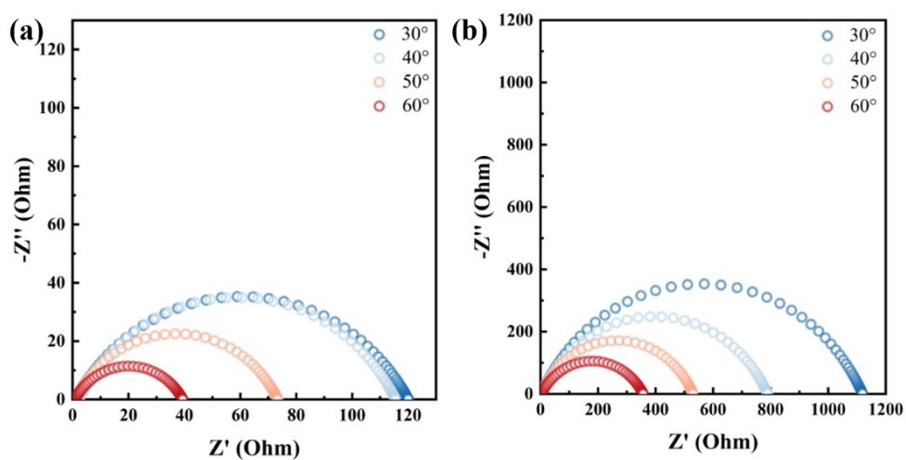

**Fig. S19.** EIS spectra of the Zn-based symmetrical batteries assembled by  $\text{CYF}_3@\text{Zn}$  (a) and bare Zn electrode (b) at different temperatures

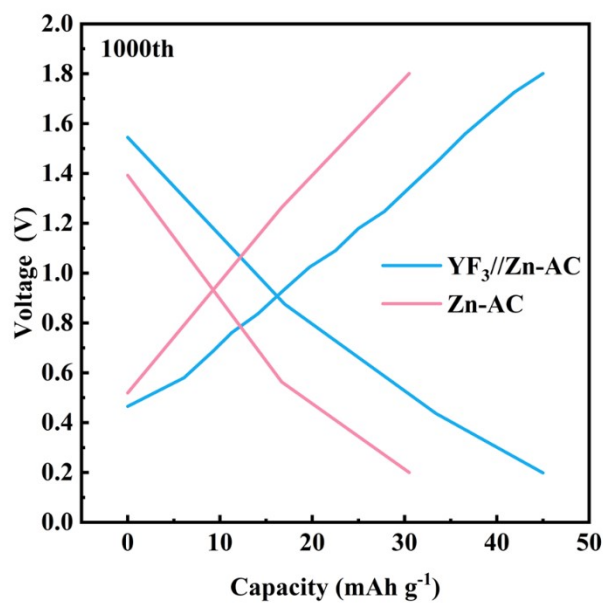

**Fig. S20.** The capacity-voltage curve of  $\text{SYF}_3@\text{Zn}//\text{AC}$  zinc ion capacitor

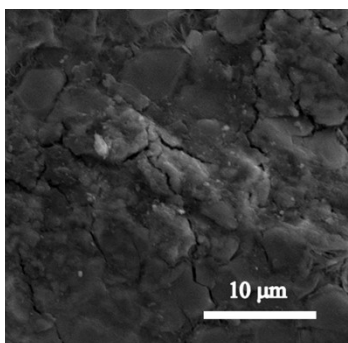

**Fig. S21.** SEM image of the Zn anode in  $\text{CYF}_3\text{@Zn//AC}$  after 2000 cycles

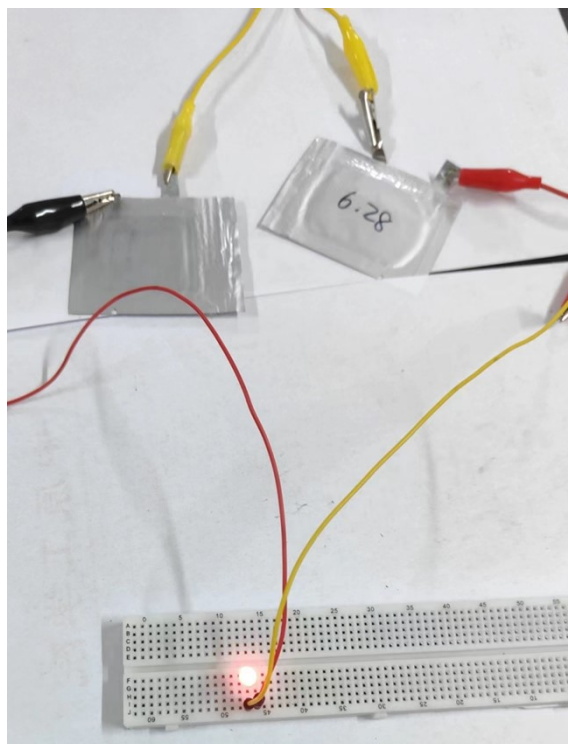

**Fig. S22.** A red LED lamp lit by pouch  $\text{SYF}_3\text{@Zn//AC}$  zinc ion capacitors

(a)

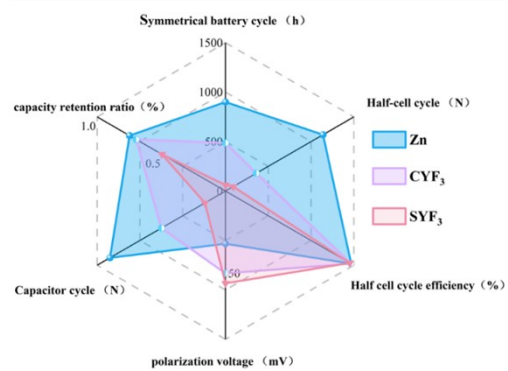

(b)

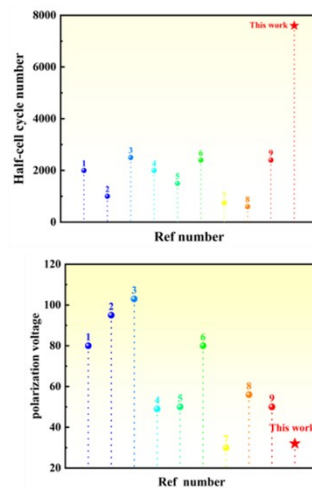

**Fig. S23.** (a) Radar chart for performance comparison of CYF<sub>3</sub>, SYF<sub>3</sub> and Zn anodes, (b) performance comparison between CYF<sub>3</sub>@Zn anode and other reported research results

**Table S1.** BET surface area and pore size of CYF<sub>3</sub> and SYF<sub>3</sub> powder according to the absorption-desorption curves

| Thermophysical                                       | CYF <sub>3</sub> | SYF <sub>3</sub> |
|------------------------------------------------------|------------------|------------------|
| BET surface area (m <sup>2</sup> g <sup>-1</sup> )   | 39.75 ± 0.12     | 50.7± 0.31       |
| Q <sub>m</sub> (cm <sup>3</sup> /g)                  | 9.13             | 11.20            |
| Molecular cross-sectional area<br>(nm <sup>2</sup> ) | 0.16             | 0.16             |

**Table S2.** The Y:F atom ratio of CYF<sub>3</sub>, SYF<sub>3</sub> powder according to EDS results

| Sample           | Y:F     |
|------------------|---------|
| SYF <sub>3</sub> | 18: 82  |
| CYF <sub>3</sub> | 26 : 74 |

**Table S3.** Thickness of the electrode sheet as measured multiple times and the calculated average thickness

| Number of tests | Zn    | YF <sub>3</sub> @Zn |
|-----------------|-------|---------------------|
| 1               | 0.192 | 0.258               |
| 2               | 0.205 | 0.278               |
| 3               | 0.202 | 0.246               |
| average value   | 0.200 | 0.260               |

## References

1. S. Gao, G. Chen, Y. Dall'Agnese, Y. Wei, Z. Gao and Y. Gao, *Chemistry - A European Journal*, 2018, **24**, 13535-13539.
2. X. Xu, H. Zeng, D. Han, K. Qiao, W. Xing, M. J. Rood and Z. Yan, *ACS Appl. Mater. Interfaces*, 2018, **10**, 37172-37180.
